# Supplementary material for: Enhancing immune regulation in vitro: the synergistic impact of 3′-sialyllactose and osteopontin in a nutrient blend following influenza virus infection
Source: Front Immunol. 2024 Feb 15;15:1271926. doi: 10.3389/fimmu.2024.1271926 (PMC10902112; doi:10.3389/fimmu.2024.1271926)
Supplement: Supplementary file 1 [file Table_1.xlsx]

## Sheet: cytotoxicity
	OPN	E		1.047	0.96	1.039	1.04	0.965	0.975	1.095	1.05	1.029	1.026
		F		1.096	1.061	1.083	1.017	1.041	0.994	1.103	1.121	1.05	1.052
		G		1.065	1.045	1.032	0.96	1.044	0.972	0.971	1.073	0.973	1.018
		average		1.06933	1.022	1.05133	1.00567	1.01667	0.980333	1.05633	1.08133	1.01733	1.032
		survival rate			95.5736	98.3167	94.0461	95.0748	91.6771	98.7843	101.122	95.1372	96.5087
					0.78	1.56	3.13	6.25	12.5	25	50	100	200	uM
		Measurement count: 1 Filter: 540
				2	3	4	5	6	7	8	9	10	11
	OPN	E		1.046	0.877	0.922	0.958	0.844	0.881	0.842	0.975	1.048	1.112
		F		1.059	0.984	1.095	1.014	0.994	1.041	1.07	1.042	1.045	1.066
		G		1.047	0.913	1.1	1.046	1.003	1.059	0.973	1.018	1.025	1.037
		average		1.05067	0.924667	1.039	1.006	0.947	0.993667	0.961667	1.01167	1.03933	1.07167
		survival rate			88.0076	98.8896	95.7487	90.1332	94.5749	91.5292	96.2881	98.9213	101.999
	3SL
					0.78	1.56	3.13	6.25	12.5	25	50	100	200	uM
		Measurement count: 1 Filter: 540
				2	3	4	5	6	7	8	9	10	11
		B		1.116	1.124	1.047	1.123	1.073	1.064	1.008	0.92	1.063	1.021
		C		1.135	1.097	1.098	1.127	1.096	1.065	1.081	1.115	0.945	1.033
		D		1.162	1.132	1.003	1.125	1.091	1.109	1.067	1.126	1.07	1.079
		average		1.13767	1.11767	1.04933	1.125	1.08667	1.07933	1.052	1.05367	1.026	1.04433
		survival rate			98.242	92.2356	98.8866	95.5171	94.8725	92.47	92.6165	90.1846	91.7961
	3SL	E		1.106	1.126	1.124	1.133	1.052	1.092	1.082	0.989	1.087	1.082
		F		1.128	1.09	1.07	1.16	1.039	1.122	1.104	1.019	1.097	1.067
		G		1.095	1.119	1.049	1.027	1.155	1.1	1.116	1.13	1.083	1.063
		average		1.10967	1.11167	1.081	1.10667	1.082	1.10467	1.10067	1.046	1.089	1.07067
		survival rate			100.18	97.4166	99.7296	97.5068	99.5494	99.1889	94.2625	98.1376	96.4854
	2FL	E		1.026	1.044	1.01	1.051	1.08	1.098	1.064	1.033	1.012	0.969
		F		0.972	1.057	1.038	0.887	0.995	0.964	0.971	1.032	1.018	1.018
		G		1.051	1.062	0.996	1.032	1.103	1.074	1.048	1.009	1.051	1.081
		average		1.01633	1.05433	1.01467	0.99	1.05933	1.04533	1.02767	1.02467	1.027	1.02267
		survival rate			103.739	99.836	97.409	104.231	102.853	101.115	100.82	101.05	100.623
	2FL	E		1.083	1.094	1.116	1.083	1.071	1.095	1.06	1.07	1.017	0.996
		F		0.985	1.047	1.043	1.115	1.009	1.048	1.006	0.995	1.115	1.066
		G		1.073	1.032	1.006	1.059	1.088	1.059	1.115	1.101	1.024	1.103
		average		1.047	1.05767	1.055	1.08567	1.056	1.06733	1.06033	1.05533	1.052	1.055
		survival rate			101.019	100.764	103.693	100.86	101.942	101.273	100.796	100.478	100.764
	6SL				0.78	1.56	3.13	6.25	12.5	25	50	100	200	uM
		Measurement count: 1 Filter: 540
				2	3	4	5	6	7	8	9	10	11
		B		1.061	1.101	0.951	1.051	1.091	1.027	0.986	1.029	1.151	1.173
		C		1.083	1.145	0.948	1.072	1.073	1.084	0.978	1.124	1.132	1.152
		D		1.064	1.132	1.094	1.014	1.082	0.988	1.068	1.104	1.137	1.037
		average		1.06933	1.126	0.997667	1.04567	1.082	1.033	1.01067	1.08567	1.14	1.12067
		survival rate			105.299	93.298	97.7868	101.185	96.6022	94.5137	101.527	106.608	104.8
	6SL	E		1.075	1.156	0.995	1.126	0.988	0.999	1.059	1.116	1.156	1.033
		F		1.074	1.121	0.994	1.104	1.066	1.041	0.981	1.14	1.14	1.04
		G		1.003	1.174	0.992	1.127	1.031	1.044	0.968	1.147	1.174	1.12
		average		1.05067	1.15033	0.993667	1.119	1.02833	1.028	1.00267	1.13433	1.15667	1.06433
		survival rate			109.486	94.5749	106.504	97.8744	97.8426	95.4315	107.963	110.089	101.301
	LNNT				0.78	1.56	3.13	6.25	12.5	25	50	100	200	uM
		Measurement count: 1 Filter: 540
				2	3	4	5	6	7	8	9	10	11
		B		1.054	1.121	1.087	0.992	1.072	1.001	1.027	1.054	1.027	1.023
		C		1.011	1.005	1.08	0.991	1.071	1.008	1.134	1.094	1.006	1.094
		D		1.021	1.098	1.081	0.992	1.007	1.03	1.108	1.092	1.025	1.04
		average		1.02867	1.07467	1.08267	0.991667	1.05	1.013	1.08967	1.08	1.01933	1.05233
		survival rate			104.472	105.25	96.4031	102.074	98.477	105.93	104.99	99.0927	102.301
					0.78	1.56	3.13	6.25	12.5	25	50	100	200	uM
	LNNT
		Measurement count: 1 Filter: 540
				2	3	4	5	6	7	8	9	10	11
		B		0.992	1.071	1.104	1.067	1.025	0.985	1.016	1.022	1.085	1.02
		C		1.091	1.065	1.024	1.013	0.995	1.063	1.104	1.104	1.044	0.981
		D		1.034	0.995	1.011	1.083	0.986	1.118	1.081	1.085	1.002	1.056
		average		1.039	1.04367	1.04633	1.05433	1.002	1.05533	1.067	1.07033	1.04367	1.019
		survival rate			100.449	100.706	101.476	96.4389	101.572	102.695	103.016	100.449	98.0751
					0.78	1.56	3.13	6.25	12.5	25	50	100	200	uM
	LNT
		Measurement count: 1 Filter: 540
				2	3	4	5	6	7	8	9	10	11
		B		1.046	1.095	1.022	1.042	1.068	1.051	1.118	1.014	1.017	1.105
		C		1.05	1.081	1.001	1.102	1.123	1.037	1.073	1.011	1.05	1.115
		D		1.094	1.073	1.015	1.098	1.061	1.005	1.017	1.023	1.109	1.038
		average		1.06333	1.083	1.01267	1.08067	1.084	1.031	1.06933	1.016	1.05867	1.086
		survival rate			101.85	95.2351	101.63	101.944	96.9592	100.564	95.5486	99.5611	102.132
	LNT				0.78	1.56	3.13	6.25	12.5	25	50	100	200	uM
		Measurement count: 1 Filter: 540
				2	3	4	5	6	7	8	9	10	11
		B		0.966	1.118	1.02	1.047	1.003	1.073	0.994	1.028	0.971	0.897
		C		1.065	1.146	0.998	1.032	0.957	0.994	1.034	1.009	1.07	0.989
		D		0.974	0.954	0.951	0.994	0.993	1.087	0.976	1.094	1.086	1.018
		average		1.00167	1.07267	0.989667	1.02433	0.984333	1.05133	1.00133	1.04367	1.04233	0.968
		survival rate			107.088	98.802	102.263	98.2696	104.958	99.9667	104.193	104.06	96.6389

## Sheet: antivirus-cal.
																		Average	SD
3SL	Measurement count: 1 Filter: 540				200	100	50	25	12.5	6.25	3.13	1.57	uM	IC50	7.81	5.836	13.64	9.09533	4.05767
			2	3	4	5	6	7	8	9	10	11
	B		0.494	0.383	0.441	0.445	0.489	0.476	0.444	0.487	0.471	0.456
	C		0.538	0.422	0.439	0.47	0.436	0.442	0.455	0.423	0.426	0.425
	D		0.498	0.407	0.479	0.501	0.453	0.461	0.468	0.438	0.423	0.419
		average	0.51	0.404	0.453	0.472	0.459333	0.459667	0.455667	0.449333	0.44	0.433333
		inhibition rate			46.2264	64.1509	52.2013	52.5157	48.7421	42.7673	33.9623	27.673
3SL	E		0.496	0.413	0.451	0.499	0.511	0.471	0.471	0.461	0.496	0.398
	F		0.503	0.437	0.474	0.485	0.486	0.488	0.466	0.422	0.447	0.413
	G		0.542	0.382	0.478	0.447	0.442	0.466	0.452	0.475	0.426	0.47
		average	0.513667	0.410667	0.467667	0.477	0.479667	0.475	0.463	0.452667	0.456333	0.427
		inhibition rate			55.3398	64.4013	66.9903	62.4595	50.8091	40.7767	44.3366	15.8576
3SL	E		0.526	0.472	0.426	0.493	0.513	0.498	0.483	0.468	0.475	0.433
	F		0.512	0.432	0.466	0.519	0.473	0.485	0.485	0.503	0.434	0.462
	G		0.535	0.407	0.457	0.496	0.478	0.446	0.459	0.481	0.505	0.429
		average	0.524333	0.437	0.449667	0.502667	0.488	0.476333	0.475667	0.484	0.471333	0.441333
		inhibition rate			14.5038	75.1908	58.3969	45.0382	44.2748	53.8168	39.313	4.96183
					1000	500	250	125	62.5	31.3	15.6	7.8	ug/mL
OPN	Measurement count: 1 Filter: 540																	Average	SD
			2	3	4	5	6	7	8	9	10	11		IC50	79.09	50.84	54.14	61.3567	15.4459
	B		0.662	0.446	0.444	0.586	0.621	0.572	0.536	0.536	0.531	0.551
	C		0.613	0.477	0.43	0.549	0.499	0.517	0.538	0.524	0.484	0.513
	D		0.634	0.467	0.451	0.65	0.628	0.567	0.515	0.513	0.465	0.447
		average	0.636333	0.463333	0.441667	0.595	0.582667	0.552	0.529667	0.524333	0.493333	0.503667
		inhibition rate			-12.5241	76.1079	68.9788	51.2524	38.343	35.2601	17.341	23.3141
					1000	500	250	125	62.5	31.3	15.6	7.8	ug/mL
OPN	Measurement count: 1 Filter: 540
			2	3	4	5	6	7	8	9	10	11
	B		0.619	0.628	0.543	0.563	0.586	0.538	0.48	0.53	0.508	0.521
	C		0.538	0.422	0.458	0.544	0.534	0.571	0.535	0.488	0.502	0.505
	D		0.558	0.427	0.514	0.556	0.523	0.495	0.559	0.543	0.511	0.484
		average	0.571667	0.492333	0.505	0.554333	0.547667	0.534667	0.524667	0.520333	0.507	0.503333
		inhibition rate			15.9664	78.1513	69.7479	53.3613	40.7563	35.2941	18.4874	13.8655
					1000	500	250	125	62.5	31.3	15.6	7.8
OPN	Measurement count: 1 Filter: 540
			2	3	4	5	6	7	8	9	10	11
	B		0.593	0.473	0.52	0.542	0.557	0.535	0.486	0.521	0.522	0.5
	C		0.554	0.456	0.519	0.573	0.514	0.524	0.515	0.496	0.497	0.516
	D		0.562	0.452	0.507	0.535	0.563	0.547	0.57	0.546	0.512	0.506
		average	0.569667	0.460333	0.515333	0.55	0.544667	0.535333	0.523667	0.521	0.510333	0.507333
		inhibition rate			28.9916	72.6891	65.9664	54.2017	39.4958	36.1345	22.6891	18.9076

## Sheet: primers-PCR
	Forward (5'-3')	Reverse (5'-3')
GADPH	GACCCCTTCATTGACCTCAAC	CATACCAGGAAATGAGCTTG
TNF-α	CTGCTGCACTTTGGAGTGAT	AGATGATCTGACTGCCTGGG
IL-6	AGCCACTCACCTCTTCAGAAC	GCCTCTTTGCTGCTTTCACAC
iNOS	CATCCTCTTTGCGACAGAGAC	GCAGCTCAGCCTGTACTTATC

## Sheet: ELISA+PCR
		C	M	OPN-L	OPN-M	OPN-H	3SL-L	3SL-M	3SL-H	3SL+OPN(LL)	3SL+OPN(LM)	3SL+OPN(LH)	3SL+OPN(ML)	3SL+OPN(MM)	3SL+OPN(MH)	3SL+OPN(HL)	3SL+OPN(HM)	3SL+OPN(HH)
OPN+3SL Elisa	TNFa	53	143	123	89.67	96.33	113	116.33	89.67	79.67	66.33	76.33	79.67	83	76.33	96.33	73	63
		66.33	143	106.33	103	89.67	126.33	103	99.67	83	76.33	73	93	79.67	83	73	66.33	69.67
		59.67	146.33	93	99.67	99.67	123	103	106.33	83	79.67	76.33	89.67	93	69.67	69.67	66.33	89.67
		59.6667	144.11	107.443	97.4467	95.2233	120.777	107.443	98.5567	81.89	74.11	75.22	87.4467	85.2233	76.3333	79.6667	68.5533	74.1133
		6.665	1.92258	15.031	6.93755	5.09102	6.93755	7.69608	8.38561	1.92258	6.94156	1.92258	6.93755	6.93755	6.665	14.5266	3.85093	13.8791
	IL-6	239.26	410.34	368.49	338.95	301.72	380.95	344.95	309.88	364.03	349.11	347.11	349.11	324.49	263.42	300.34	255.72	253.26
		255.42	419.88	351.72	351.42	300.49	387.72	352.95	326.95	370.03	352.49	333.57	343.26	321.42	264.18	272.18	267.88	263.11
		244.49	422.65	358.03	357.42	299.72	378.65	346.65	336.95	360.65	338.49	339.72	344.49	330.18	259.88	279.11	286.18	269.26
		246.39	417.623	359.413	349.263	300.643	382.44	348.183	324.593	364.903	346.697	340.133	345.62	325.363	262.493	283.877	269.927	261.877
		8.24584	6.45782	8.47015	9.42198	1.00878	4.71501	4.21466	13.688	4.75059	7.30535	6.77946	3.08436	4.44482	2.29489	14.6727	15.3328	8.07099
	iNOS	2.86	4.86	4.2	4.13	3.52	4.91	4.26	3.89	4.2	4.27	3.85	4.16	3.74	3.38	3.73	3.7	3.73
		2.78	5.35	5.21	4.16	3.41	4.04	3.99	3.9	3.74	4.13	4.1	4.44	3.79	3.24	3.75	3.67	3.62
		2.96	5.22	5.02	4	3.97	5.33	4.19	3.94	4	3.91	3.84	4.78	3.83	3.32	3.77	3.65	3.59
		2.86667	5.14333	4.81	4.09667	3.63333	4.76	4.14667	3.91	3.98	4.10333	3.93	4.46	3.78667	3.31333	3.75	3.67333	3.64667
		0.090185	0.253837	0.536749	0.085049	0.296704	0.657951	0.140119	0.0264575	0.230651	0.181475	0.147309	0.310483	0.0450925	0.0702377	0.02	0.0251661	0.0737111
OPN+3SL PCR	TNFa	0.993132	98.6623	86.1859	73.9818	73.6899	91.7575	85.7154	79.4294	65.73	52.96	51.89	63.61	77.4	50.29	76.22	66.85	69.76
		0.981164	105.684	84.8509	69.4946	91.175	100.844	91.4215	88.2943	53.51	49.41	57.7	66.99	69.81	47.56	74.42	76.2	64.87
		1.02625	118.4	74.4391	74.0456	76.4156	101.6	86.6027	61.7836	64	56.11	48.5	74.98	63.42	47.72	67.12	76.4	58.22
		1.00018	107.582	81.8253	72.5073	80.4268	98.067	87.9132	76.5024	61.08	52.8267	52.6967	68.5267	70.21	48.5233	72.5867	73.15	64.2833
		0.0233523	10.0049	6.43137	2.60929	9.4074	5.47726	3.07048	13.4955	6.61263	3.35199	4.65274	5.83868	6.99858	1.53207	4.81906	5.45688	5.79233
	IL-6	1.36286	146.001	127.719	91.5195	80.2019	108.22	79.3615	59.3781	95.38	67.96	58.4	81.03	98.27	57.85	60	61.59	58.44
		0.862753	155.775	112.192	94.5453	82.9436	95.7163	71.409	68.1502	94.73	86.71	52.48	89.56	84.05	45.77	69.89	55.45	69.71
		0.850475	175.719	111.639	83.4533	93.3523	103.425	83.325	69.1799	85.54	67.78	57.75	80.34	78.34	57.54	61.94	58.32	58.26
		1.02536	159.165	117.183	89.8394	85.4993	102.454	78.0318	65.5694	91.8833	74.15	56.21	83.6433	86.8867	53.72	63.9433	58.4533	62.1367
		0.292347	15.1462	9.12838	5.73369	6.93773	6.3083	6.0683	5.3865	5.50309	10.8777	3.24658	5.13559	10.2633	6.88665	5.24052	3.07217	6.55932
	iNOS	1.05062	8.71745	6.21244	5.57278	3.1644	7.64374	5.20114	6.04115	8.41	4.4	6.19	5.99	4.7	3.87	5.65	7.12	4.41
		1.08458	8.56716	5.73727	4.84465	4.31585	8.00704	4.76704	4.357	7.17	6.39	5.42	6.78	5.31	3.59	5.87	7.27	4.1
		0.877589	9.69129	5.4433	4.71562	5.1515	6.8757	6.12399	5.83958	7.57	7.21	7.17	5.21	4.68	4.14	6.5	8.41	3.72
		1.00426	8.99197	5.79767	5.04435	4.21058	7.50883	5.36406	5.41258	7.71667	6	6.26	5.99333	4.89667	3.86667	6.00667	7.6	4.07667
		0.11101	0.610277	0.388112	0.462163	0.997723	0.577607	0.692989	0.919696	0.632877	1.44503	0.877097	0.785005	0.358097	0.275015	0.441173	0.705479	0.345591
